# Supplementary material for: A validated eco-friendly HPLC-FLD for analysis of the first approved antiviral remdesivir with other potential add-on therapies for COVID-19 in human plasma and pharmaceuticals
Source: Royal Society of Chemistry journal article supplement (doi:10.1039/d3ay01562a), 2023-01-01
Supplement: d3ay01562a1.pdf [file d3ay01562a1.pdf]

Empower<sup>3</sup>  
SOFTWARE

## Multi Sample Summary

### SAMPLE INFORMATION

|                   |                           |                     |                     |
|-------------------|---------------------------|---------------------|---------------------|
| Sample Name:      | 1000 ng Plasma            | Acquired By:        | YARA                |
| Sample Type:      | Unknown                   | Sample Set Name:    |                     |
| Vial:             | 10                        | Acq. Method Set:    | FLR Iso             |
| Injection #:      | 1                         | Processing Method:  | Default             |
| Injection Volume: | 10.00 ul                  | Channel Name:       | 2475ChA ex330/em440 |
| Run Time:         | 12.0 Minutes              | Proc. Chnl. Descr.: | 2475ChA ex330/em440 |
| Date Acquired:    | 10/16/2022 2:32:15 PMEET  |                     |                     |
| Date Processed:   | 10/21/2023 10:11:24 AMEET |                     |                     |

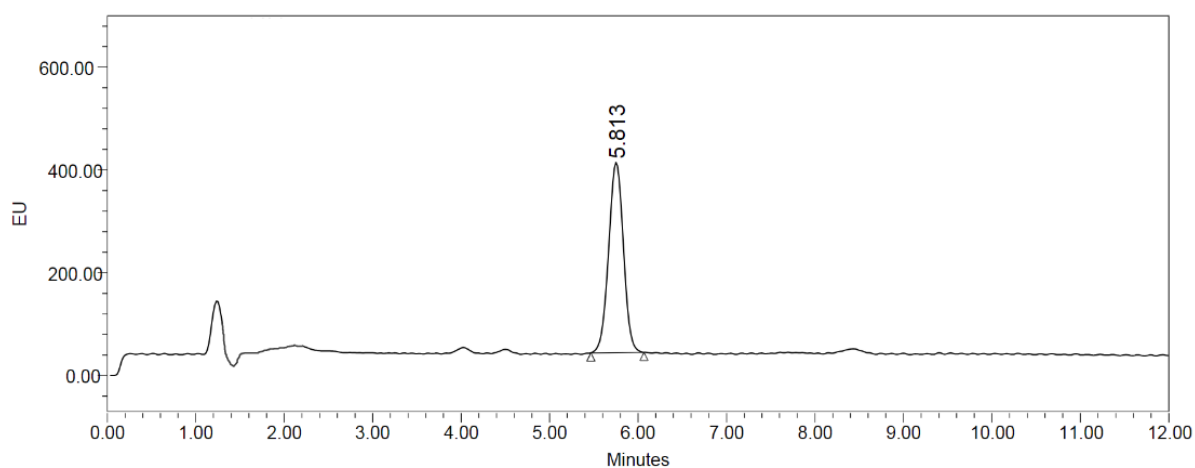

|   | RT    | Area     | %Area  | Height  |
|---|-------|----------|--------|---------|
| 1 | 5.813 | 11747242 | 100.00 | 1087913 |

| SAMPLE INFORMATION |                           |                     |                    |
|--------------------|---------------------------|---------------------|--------------------|
| Sample Name:       | 1000 ng Plasma            | Acquired By:        | YARA               |
| Sample Type:       | Unknown                   | Sample Set Name:    |                    |
| Vial:              | 20                        | Acq. Method Set:    | FLR Iso            |
| Injection #:       | 1                         | Processing Method:  | Default            |
| Injection Volume:  | 10.00 ul                  | Channel Name:       | 2475ChBex325/em367 |
| Run Time:          | 12.0 Minutes              | Proc. Chnl. Descr.: | 2475ChBex325/em367 |
| Date Acquired:     | 10/16/2022 2:32:15 PMEET  |                     |                    |
| Date Processed:    | 10/21/2023 10:11:24 AMEET |                     |                    |

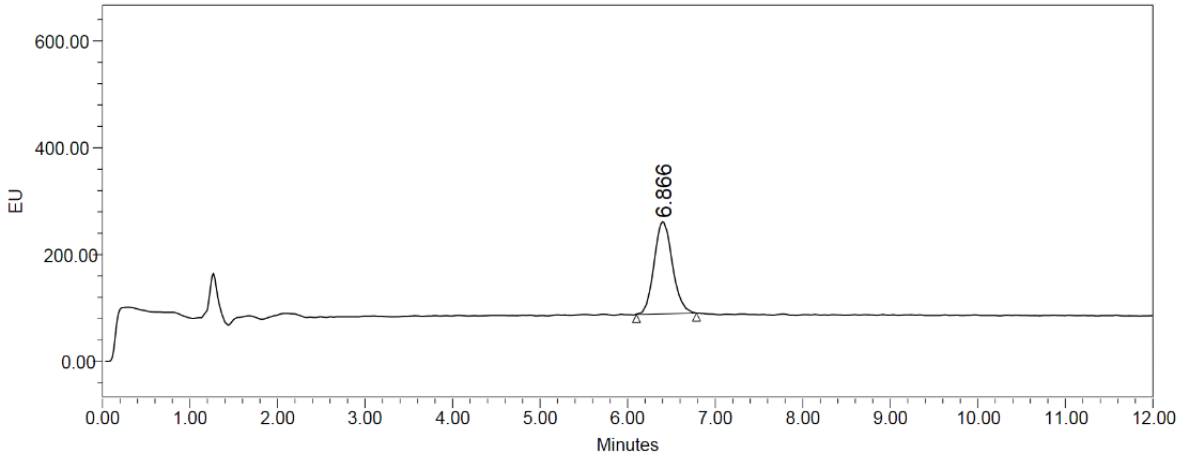

|   | RT    | Area    | %Area  | Height |
|---|-------|---------|--------|--------|
| 1 | 6.866 | 1928170 | 100.00 | 177540 |

| SAMPLE INFORMATION |                           |                     |                    |
|--------------------|---------------------------|---------------------|--------------------|
| Sample Name:       | 1000 ng Plasma            | Acquired By:        | YARA               |
| Sample Type:       | Unknown                   | Sample Set Name:    |                    |
| Vial:              | 20                        | Acq. Method Set:    | FLR Iso            |
| Injection#:        | 1                         | Processing Method:  | Ex 330 em440       |
| Injection Volume:  | 10.00 ul                  | Channel Name:       | 2475ChCex330/em440 |
| Run Time:          | 12.0 Minutes              | Proc. Chnl. Descr.: | 2475ChCex330/em440 |
| Date Acquired:     | 10/16/2022 2:32:15 PMEET  |                     |                    |
| Date Processed:    | 10/21/2023 10:11:24 AMEET |                     |                    |

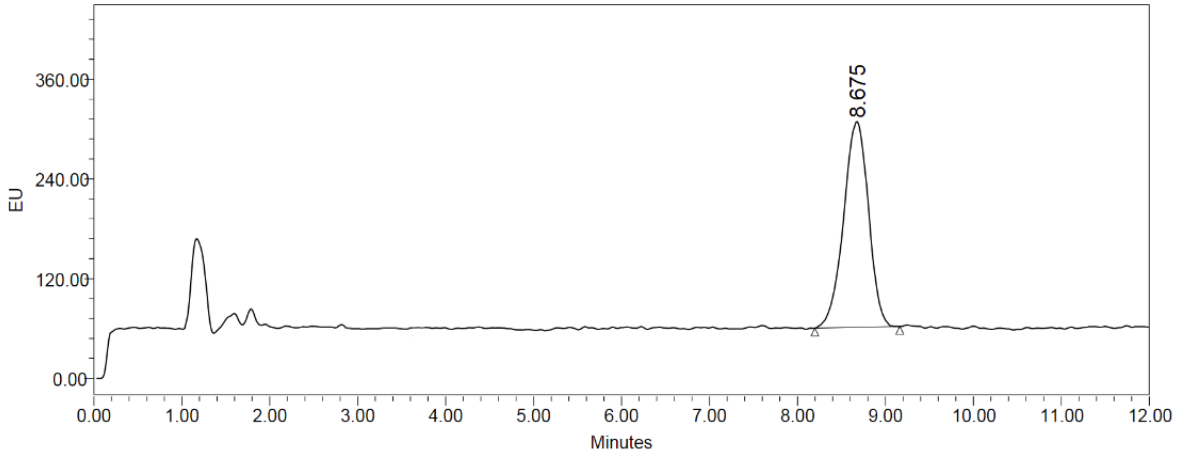

|   | RT    | Area    | %Area | Height |
|---|-------|---------|-------|--------|
| 1 | 8.675 | 6802585 | 66.09 | 667526 |
